# Supplementary material
Source: publisher figshare collection journal article supplement (https://tandf.figshare.com/ndownloader/files/17135912)
Supplement: Supplementary file 1 [file 17135912]

Table S1 Tukey Test values for friction angle

|  | *ds*= 0.005 m | | | *ds*= 0.008 m | | |
| --- | --- | --- | --- | --- | --- | --- |
| Orientation (°) | Mean difference (°) | *p* | F value | Mean difference (°) | *p* | F value |
| 45-0 | -12.3100 | 0.000 | 98.803 | -9.11324 | 0.000 | 83.690 |
| 90-0 | -14.0699 | 0.000 |  | -11.65403 | 0.000 |  |
| 90-45 | -1.7598 | 0.000 |  | -2.54079 | 0.000 |  |

Table S2 Tukey test values for log diameter on entrainment depth.

| *Dlog* (m) |  |  |  |  |  |  |
| --- | --- | --- | --- | --- | --- | --- |
|  | *ds* = 0.005 m | | | *ds* = 0.008 m | | |
| *Parallel* | Mean difference (m), | *p* | F value | Mean difference (m), | *p* | F value |
| 0.04-0.03 | 0.0062 | 0.000 | 60.700 | 0.0061 | 0.002 | 52.965 |
| 0.05-0.03 | 0.0143 | 0.000 |  | 0.0146 | 0.000 |  |
| 0.05-0.04 | 0.0081 | 0.000 |  | 0.0085 | 0.000 |  |
| *Oblique* |  |  |  |  |  |  |
| 0.04-0.03 | 0.0023 | 0.007 | 33.372 | 0.0017 | 0.008 | 37.220 |
| 0.05-0.03 | 0.0049 | 0.000 |  | 0.0047 | 0.000 |  |
| 0.05-0.04 | 0.0026 | 0.003 |  | 0.0030 | 0.007 |  |
| *Transverse* |  |  |  |  |  |  |
| 0.04-0.03 | 0.0019 | 0.001 | 34.453 | 0.0014 | 0.055 | 22.993 |
| 0.05-0.03 | 0.0042 | 0.000 |  | 0.0041 | 0.000 |  |
| 0.05-0.04 | 0.0023 | 0.001 |  | 0.0026 | 0.002 |  |

Table S3 Tukey test values for log length on entrainment depth

| *Llog* (m) |  |  |  |  |  |  |
| --- | --- | --- | --- | --- | --- | --- |
|  | *ds* = 0.005 m | | | *ds* = 0.008 m | | |
| Parallel | Mean difference (m), | *p* | F value | Mean difference (m), | *p* | F value |
| 0.20-0.15 | 0.0005 | 0.998 | 0.093 | 0.0005 | 0.997 | 0.111 |
| 0.25-0.15 | 0.0010 | 0.985 |  | 0.0015 | 0.955 |  |
| 0.25-0.20 | 0.0005 | 0.998 |  | 0.0010 | 0.987 |  |
| 0.30-0.15 | 0.0014 | 0.959 |  | 0.0013 | 0.971 |  |
| 0.30-0.20 | 0.0009 | 0.988 |  | 0.0007 | 0.994 |  |
| 0.30-0.25 | 0.0004 | 0.999 |  | -0.0002 | 0.999 |  |
| Oblique |  |  |  |  |  |  |
| 0.20-0.15 | -0.0008 | 0.864 | 1.189 | -0.0004 | 0.973 | 0.499 |
| 0.25-0.15 | -0.0017 | 0.363 |  | 0.0000 | 0.999 |  |
| 0.25-0.20 | -0.0009 | 0.820 |  | 0.0005 | 0.958 |  |
| 0.30-0.15 | -0.0016 | 0.410 |  | -0.0010 | 0.741 |  |
| 0.30-0.20 | -0.0008 | 0.861 |  | -0.0006 | 0.935 |  |
| 0.30-0.25 | 0.0000 | 0.999 |  | -0.0011 | 0.699 |  |
| Transverse |  |  |  |  |  |  |
| 0.20-0.15 | -0.0007 | 0.801 | 4.169 | 0.0000 | 1 | 0.765 |
| 0.25-0.15 | -0.0019 | 0.095 |  | 0.0000 | 0.999 |  |
| 0.25-0.20 | -0.0012 | 0.459 |  | -0.0001 | 0.999 |  |
| 0.30-0.15 | -0.0026 | 0.012 |  | -0.0012 | 0.595 |  |
| 0.30-0.20 | -0.0019 | 0.112 |  | -0.0012 | 0.584 |  |
| 0.30-0.25 | -0.0006 | 0.840 |  | -0.0011 | 0.647 |  |

Table S4 Tukey Test values for bed roughness and orientation on entrainment water depth

| Bed sizes (m) | Difference of means (m) | Standard Error (m) | T-Value | p |
| --- | --- | --- | --- | --- |
| 0.005‑0.008 | 0.001714 | 0.000383 | 4.48 | 0.000 |
| Orientation (°) |  |  |  |  |
| 45 - 90 | 0.001583 | 0.000469 | 3.38 | 0.002 |
| 0 - 90 | 0.016958 | 0.000469 | 36.19 | 0.000 |
| 0 - 45 | 0.015375 | 0.000469 | 32.81 | 0.000 |

Table S5 Tukey test values for blockage ratio on relative entrainment depth

| *Dlog (*m) | mean | *p* | F value |
| --- | --- | --- | --- |
| 0.04-0.03 | -0.041 | 0.453 | 0.927 |
| 0.05-0.03 | -0.039 | 0.492 |  |
| 0.05-0.04 | 0.002 | 0.997 |  |

| (a)  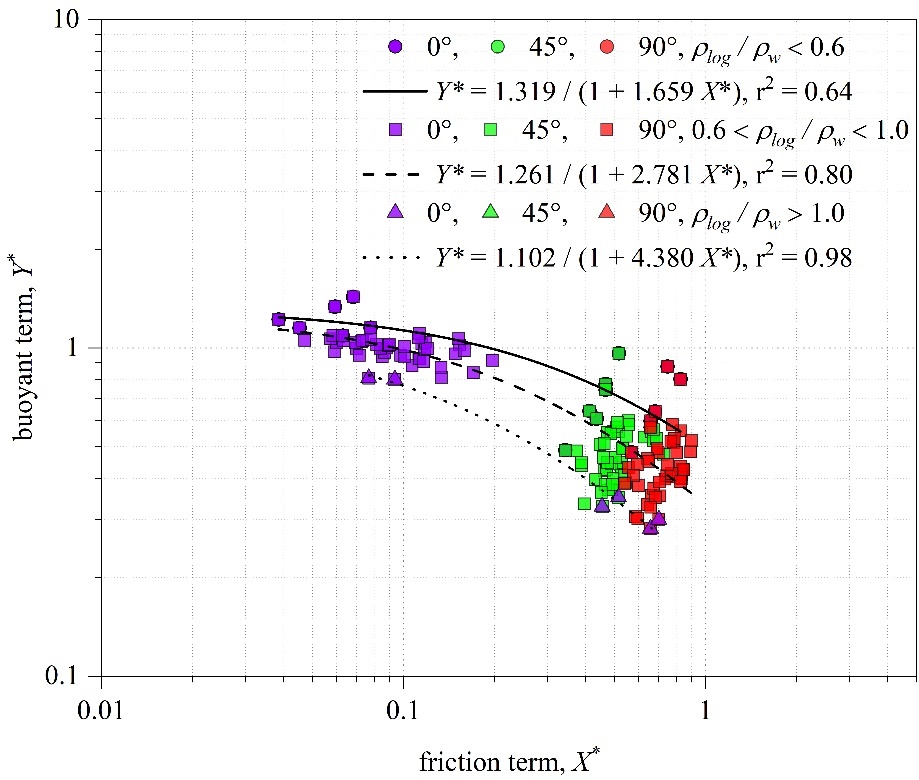 |
| --- |
| (b)  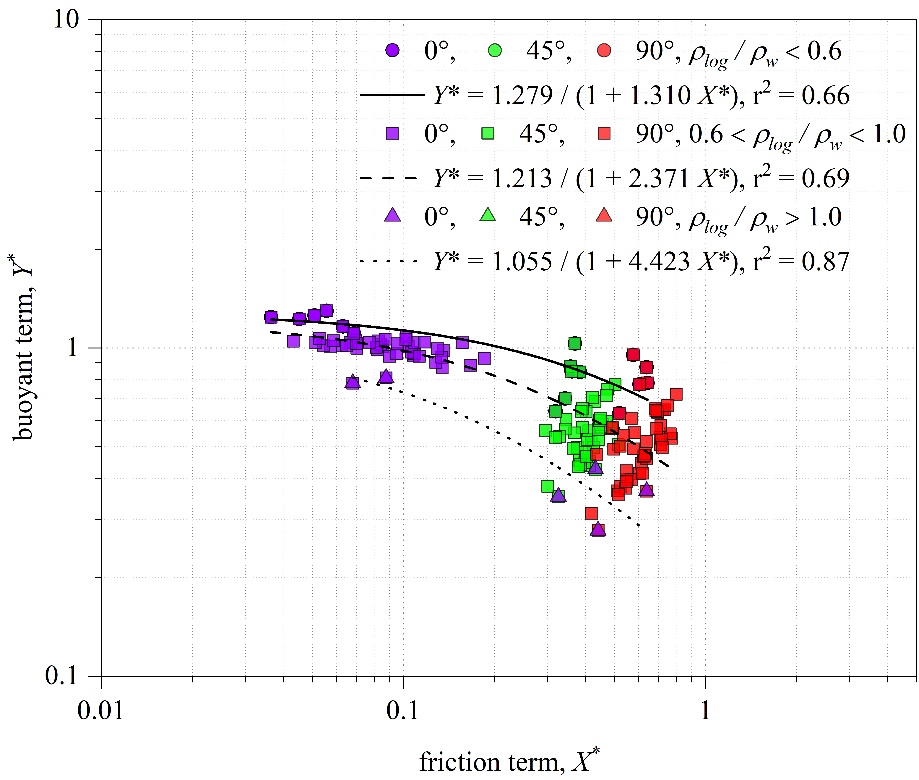 |

Figure S1. Plot of against for three relative densities and the incipient motion equations for (a) *ds* = 0.005 m and (b) *ds*= 0.008 m
